# Supplementary material for: Acceptability and Utilization of Three Nutritional Supplements during Pregnancy: Findings from a Longitudinal, Mixed-Methods Study in Niger
Source: MDPI journal article supplement (doi:10.3390/nu10081073), 2018-08-12
Supplement: s1 [file s1]

**Table S1: Nutritional composition of study supplements**

|                                                       | <b>US RDA/AI<br/>for pregnant<br/>women</b> | <b>IFA</b> | <b>MMN</b> | <b>MQ-LNS<br/>(40g)</b> |
|-------------------------------------------------------|---------------------------------------------|------------|------------|-------------------------|
| Energy (kcal)                                         | 2500                                        | ---        | ---        | 237                     |
| Proteins (g)                                          | 50                                          | ---        | ---        | 5.2                     |
| Milk proteins (g)                                     | ---                                         | ---        | ---        | 1.7                     |
| Lipids (g)                                            | ---                                         | ---        | ---        | 20                      |
| LA ( <i>Linoleic Acid</i> ) (g)                       | ---                                         | ---        | ---        | 6.9                     |
| ALA ( <i><math>\alpha</math>-Linolenic Acid</i> ) (g) | ---                                         | ---        | ---        | 1.16                    |
| Calcium (mg)                                          | 1000                                        | ---        | 559        | 559                     |
| Phosphorus ( <i>free</i> ) (mg)                       | 700                                         | ---        | 400        | 400                     |
| Potassium (mg)                                        | 4700                                        | ---        | 400        | 400                     |
| Magnesium (mg)                                        | 350                                         | ---        | 130        | 130                     |
| Zinc (mg)                                             | 11                                          | ---        | 30         | 30                      |
| Copper (mg)                                           | 1                                           | ---        | 4          | 4                       |
| Iron (mg)                                             | 27                                          | 60         | 30         | 30                      |
| Manganese (mg)                                        | 2                                           | ---        | 2.6        | 2.6                     |
| Iodine ( $\mu$ g)                                     | 220                                         | ---        | 250        | 250                     |
| Selenium ( $\mu$ g)                                   | 60                                          | ---        | 130        | 130                     |
| Vitamin A ( $\mu$ g)                                  | 800                                         | ---        | 800        | 800                     |
| Vitamin B <sub>1</sub> (mg)                           | 1.4                                         | ---        | 2.8        | 2.8                     |
| Vitamin B <sub>2</sub> (mg)                           | 1.4                                         | ---        | 2.8        | 2.8                     |
| Niacin B <sub>3</sub> (mg)                            | 18                                          | ---        | 36         | 36                      |
| Pantothenic acid - B <sub>5</sub> (mg)                | 6                                           | ---        | 7          | 7                       |
| Vitamin B <sub>6</sub> (mg)                           | 1.9                                         | ---        | 3.8        | 3.8                     |
| Vitamin B <sub>12</sub> ( $\mu$ g)                    | 2.6                                         | ---        | 5.2        | 5.2                     |
| Folic acid ( $\mu$ g)                                 | 600                                         | 400        | 400        | 400                     |
| Vitamin C (mg)                                        | 85                                          | ---        | 100        | 100                     |
| Vitamin D <sub>3</sub> ( $\mu$ g)                     | 15                                          | ---        | 15         | 15                      |
| Vitamin E (mg)                                        | 15                                          | ---        | 20         | 20                      |
| Vitamin K <sub>1</sub> ( $\mu$ g)                     | 90                                          | ---        | 45         | 45                      |

RDA / AI = recommended dietary allowance / adequate intake

IFA = Iron and folic acid

MMN = Multiple micronutrients

MQ-LNS = Medium-quantity lipid-based nutrient supplement
